# Supplementary material for: Structural similarities and functional differences clarify evolutionary relationships between tRNA healing enzymes and the myelin enzyme CNPase
Source: PubMed Central journal article supplement (PMC5434554; doi:10.1186/s12858-017-0084-2), 2017-05-16
Supplement: 12858_2017_84_MOESM2_ESM.pdf [file 12858_2017_84_MOESM2_ESM.pdf]

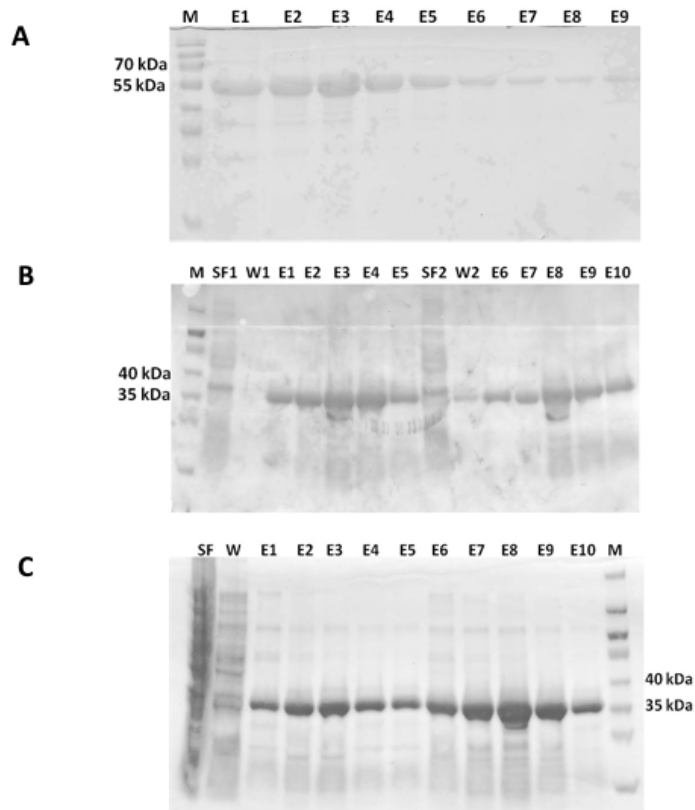

**Supplementary Figure 1. The yeast PNK/CPDase and CPDase proteins purified by Ni-NTA affinity chromatography. A)** SDS-PAGE from a Ni-NTA purification of *ScTrl1* PNK/CPDase. M: marker, E1-E8: fractions eluted with 500 mM imidazole. The calculated size of the protein was 52.7 kDa. **B)** SDS-PAGE from Ni-NTA purifications of *ScTrl1* CPDase and *ScTrl1* (N+) CPDase. M: marker, SF1 and W1 are supernatant and wash flow-through samples from the purification of *ScTrl1* CPDase, E1-E5: *ScTrl1* CPDase fractions eluted with 500 mM imidazole. The calculated size of the protein was 32.2 kDa. SF2 and W2 are supernatant and wash flow-through samples from the purification of *ScTrl1* (N+) CPDase, E6-E10: *ScTrl1* (N+) CPDase fractions eluted with 500 mM imidazole. The calculated size of the protein was 32.4 kDa. **C)** SDS PAGE from a Ni-NTA purification of *ScTrl1* (N-) CPDase. SF: supernatant flow-through, W: wash flow-through, E1-E10: fractions eluted with 500 mM imidazole, M: marker. The calculated size of the protein was 29.6 kDa.
