# Supplementary material for: Structural similarities and functional differences clarify evolutionary relationships between tRNA healing enzymes and the myelin enzyme CNPase
Source: PubMed Central journal article supplement (PMC5434554; doi:10.1186/s12858-017-0084-2), 2017-05-16
Supplement: 12858_2017_84_MOESM3_ESM.pdf [file 12858_2017_84_MOESM3_ESM.pdf]

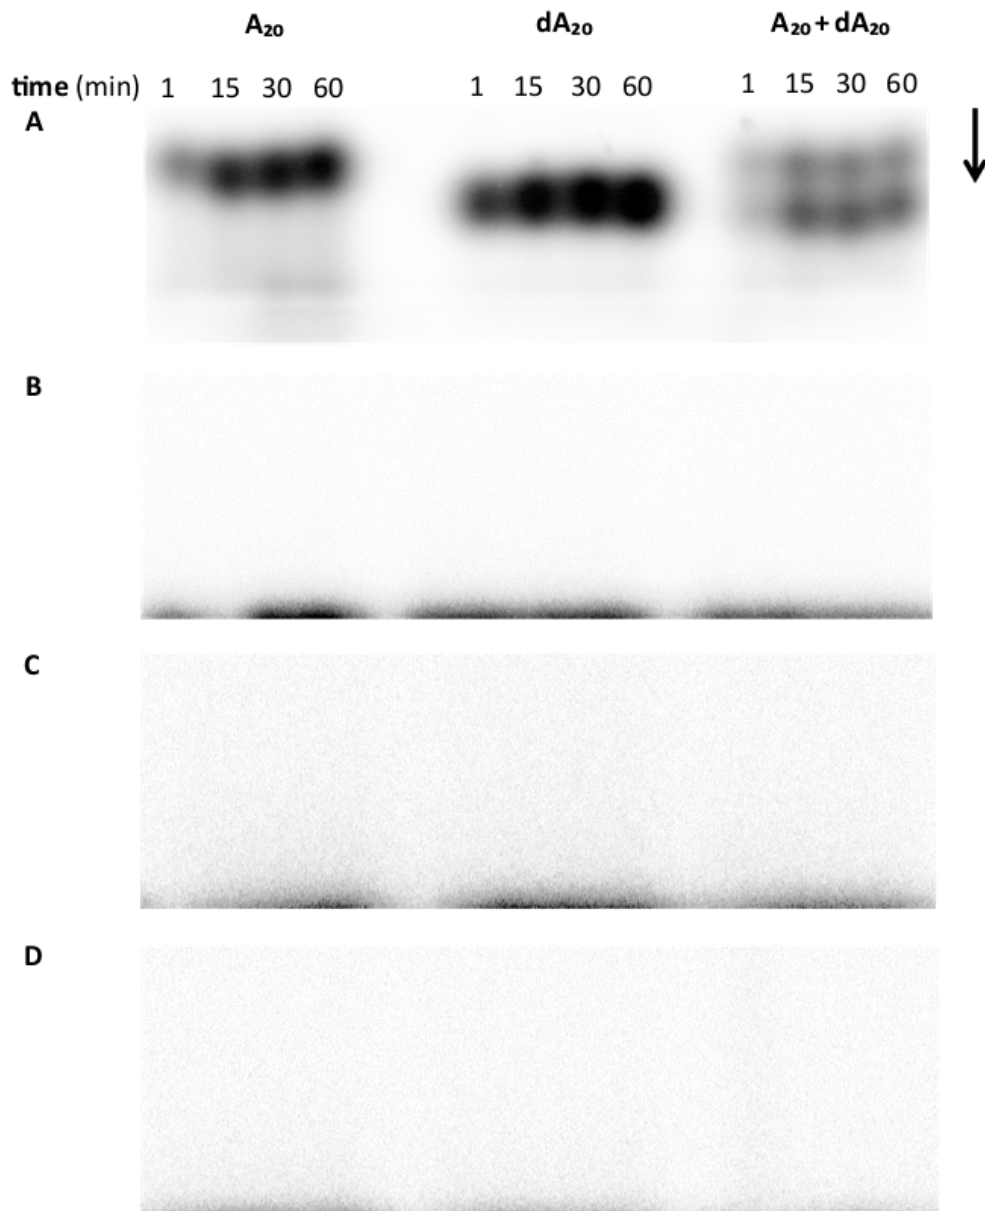

**Supplementary Figure 2. Polynucleotide kinase activity assay.** PNK reaction mixtures of **A)** T4 PNK, **B)** *MmCNPase*, **C)** *MmCNP\_N*, and **D)** *MmCNP\_C*. The reactions were carried out in the presence of Mg<sup>2+</sup>, with ATP as phosphate donor and with either A<sub>20</sub>, dA<sub>20</sub>, or both. T4 PNK was used as a positive control to validate the assay setup. The *MmCNP* domains were tested separately, with a negative result in the chosen assay conditions. The arrow represents the direction of electrophoresis.
